# Supplementary material for: A Novel Quadruple Gene-Deleted BoHV-1-Vectored RVFV Subunit Vaccine Induces Humoral and Cell-Mediated Immune Response against Rift Valley Fever in Calves
Source: MDPI journal article supplement (doi:10.3390/v15112183), 2023-10-30
Supplement: s1 [file s1]

5' **GGTACC** TAGTTATTAATAGTAATCAATTACGGGGTCATTAGTTCATAGCCCATATATGGAGTTCGCGT

**Kpn-1 CMV-IE promoter**

TACATAACTTACGGTAAATGGCCCGCCTGGCTGACCGCCCAACGACCCCGCCCATTTGACGTCAATAATG  
ACGTATGTTCCCATAGTAACGCCAATAGGGACTTTCATTGACGTCAATGGGTGGAGTATTTACGGTAAA  
CTGCCCACTTGGCAGTACATCAAGTGTATCATATGCCAAGTACGCCCCCTATTGACGTCAATGACGGTAA  
ATGGCCCGCCTGGCATTATGCCAGTACATGACCTTATGGGACTTTCCTACTTGGCAGTACATCTACGTA  
TTAGTCATCGCTATTACCATGGTGATGCGGTTTTGGCAGTACATCAATGGGCGTGGATAGCGGTTTGACT  
CACGGGGATTTCGAAGTCTCCACCCCATTTGACGTCAATGGGAGTTTGTGTTTGGCACCAAAATCAACGGGA  
CTTTCCAAAATGTCGTAACAACCTCCGCCCCATTGACGCAAATGGGCGGTAGGCGTGTACGGTGGGAGGTC  
TATATAAGCAGAGCTGGTTTAGTGAACCGTCAGATCCGCTAGCGCTACCGGT **GCCGCCACCMQ**GPLAVL

**Kozak sequence**

**BoHV-1 gD signal sequence (1-19 aa)**

GALLAVAVSL**MEDPHLRNRP**KGHNIDGMTQEDATCKPVTYAGACSSFDVLLLEKKGKFLFQSYAHHRTL

**RVFV Gn sequence (1, 154-581 aa)**

LEAVHDTIIAKADPPSCDLLSAHGNPCMKELVMKTHCPNDYQSAHYLNNDGKMASVKCPKYELEDN  
FCRQMTGASLKKGSYPLQDLFCQSSSEDDGSKLKTMMKGVCEVGVQALKKCDGQLSTAHEVVPFAVFNKSK  
KVYLDKLDLKTENLLPDSFVCFEHKGQYKGTMDSGQTKRELKSFDISQCPKIGGHGSKKCTGDAAFCSA  
YECTAQYANAYCSHANGSGIVQIQVSGVWKKPLCVGYERVVVKRELSAKPIQRVEPCTTCITKCEPHGLV  
VRSTGFKISSAVACASGVCVTGSQSPSTEITLKYPGISQSSGGDIGVHMAHDDQSVSSKIVAHCPPQDPC  
LVHDCIVCAHGLINYQCHTRVLKCLKIAPRKVLNPLMWITAFIRWIYKKMVARVADNINQVNREIGWMEG

**Gn cytoplasmic tail (605-674 aa)**

**GQLVLGNPAPIPRHAPIPRM**APTRPNTATRPWQHVDALKEALSLLNHSSDTPDAVMNDTEVVSEKFDSQE

**Bovine GMCSF (1, 18-143 aa)**

PTCLQTRLKLYKNGLQGSLSLMGSLTMMATHYEKHCPTPETSCGTQFISFKNFKEDLKEFLFIIPFDC  
WEPAQK**GACTACAAAGACGATGACGACAAG****GSGATNFSLKQAGDVEENPGPM**CSELIQASSRITTCSTE

**Flag Tag GSG + Peptide 2A RVFV Gc with transmembrane and cytoplasmic (1, 691-1197 aa)**

GVNTKRLSGTALIRAGSVGAELMLKGVKEDQTKFLKIKTVSSELSCREGQSYWTGSFSPKCLSSRRC  
HLVGECHVNRCLSWRDNETSAEFSFVGESTTMRNKCFEQCGWGCGCFNVNPSCLFVHTYQLQSVRKEAL  
RVFNCIDVWHKLTLEITDFDGSVSTIDLGASSSRFTNWGSVLSLDAEGISGSNSFSFIESPGKYAIVD  
EPFSEIPRQGFLGEIRCNESSVLSAHESCLRAPNLISYKPMIDQLECTTNLIDPFVVFERSLPQTRND  
KTFAASKGNRGVQAFSGKSVQADLTLMFDNFVDFVGAAVSCDAAFLNLTGCYSCNAGARVCLSITSTGT  
GSLSAHNKDGLHIVLPSENGTKDQCQILHFTVPEVEEEFMYSCDGDERPLLKGTLIAIDPFDDRREAG  
GESTVVPKSGSWNFFDWFSGLMSWFGGPLKTIILICLYVALSIGLFFLLIYLGRTGLSKMWLAATKKAS

ggtaagcctatccctaaccctctcctcggtctcgattctacgcgtaccggt**TAA**CTGATCATAATCAGCC

**V5 Epitope**

**Stop codon**

**SV40 PolyA**

ATACCACATTTGTAGAGGTTTTACTTGCTTTAAAAAACCTCCCACACCTCCCCCTGAACCTGAAACATAA  
AATGAATGCAATTGTTGTTGTTAACTTGTGTTATTGCAGCTTATAATGGTTACAAATAAAGCAATAGCATC  
ACAAATTTACAAATAAAGCATTTTTTCTACTGCATTCTAGTTGTGGTTTGTCCAAACTCATCAATGTAT  
CTTA**AAGCTT**<sup>-3'</sup>

**Hind III**

**Figure S1: RVFV Gn-FLAG-P2A-Gc-V5 chimera sequence.** RVFV Gn and Gc sequence with the KpnI and HindIII sites were designed to include 5'-3' the following: KpnI site, CMV-IE promoter, Kozak sequence, BoHV-1 gD signal peptide, RVFV Gn without the transmembrane domain, Gn cytoplasmic tail, Bovine GMCSF, Flag tag, GSG sequence to improve cleavage efficiency, Peptide 2 A sequence, RVFV Gc region with transmembrane domain, V5 epitope, stop codon, SV polyA tail sequence and HindIII site.

**Table S1.** Vaccine virus or vector virus isolation from nasal swab samples in MDBK cells.

| S no.: | Group                                  | Animal # | Nasal virus shedding following immunization (Plaque forming units/nasal swab)<br>(Days post-vaccination) |                   |                   |                   |        |        |        |        |        |
|--------|----------------------------------------|----------|----------------------------------------------------------------------------------------------------------|-------------------|-------------------|-------------------|--------|--------|--------|--------|--------|
|        |                                        |          | Day 0                                                                                                    | Day 3             | Day 5             | Day 7             | Day 14 | Day 21 | Day 28 | Day 28 | Day 33 |
| 1      | BoHV-1qmv<br>vector control<br>group   | 868      | 0                                                                                                        | $3.0 \times 10^3$ | $2.5 \times 10^2$ | $5.0 \times 10^1$ | 0      | 0      | 0      | 0      | 0      |
| 2      |                                        | 866      | 0                                                                                                        | $2.0 \times 10^2$ | 0                 | $5.0 \times 10^1$ | 0      | 0      | 0      | 0      | 0      |
| 3      |                                        | 890      | 0                                                                                                        | $2.0 \times 10^2$ | 0                 | 0                 | 0      | 0      | 0      | 0      | 0      |
| 1      | BoHV-1qmv<br>Sub-RVSV<br>vaccine group | 865      | 0                                                                                                        | $4.8 \times 10^3$ | 0                 | 0                 | 0      | 0      | 0      | 0      | 0      |
| 2      |                                        | 860      | 0                                                                                                        | $4.0 \times 10^2$ | 0                 | 0                 | 0      | 0      | 0      | 0      | 0      |
| 3      |                                        | 875      | 0                                                                                                        | $5.0 \times 10^1$ | $5.0 \times 10^1$ | 0                 | 0      | 0      | 0      | 0      | 0      |
| 4      |                                        | 862      | 0                                                                                                        | $2.0 \times 10^2$ | 0                 | 0                 | 0      | 0      | 0      | 0      | 0      |
| 5      |                                        | 867      | 0                                                                                                        | $5.0 \times 10^2$ | 0                 | 0                 | 0      | 0      | 0      | 0      | 0      |
| 6      |                                        | 876      | 0                                                                                                        | $3.0 \times 10^3$ | 0                 | 0                 | 0      | 0      | 0      | 0      | 0      |
| 7      |                                        | 879      | 0                                                                                                        | $9.0 \times 10^2$ | 0                 | 0                 | 0      | 0      | 0      | 0      | 0      |
| 8      |                                        | 828      | 0                                                                                                        | $4.3 \times 10^3$ | 0                 | 0                 | 0      | 0      | 0      | 0      | 0      |

**Table S2.** Quantification of bovine herpesvirus type 1 (BoHV-1) genome copies in nasal swab samples collected from the vaccine virus or vector virus inoculated calves by qPCR.

| S no.: | Group                                  | Animal # | Nasal virus shedding following immunization (qPCR; viral genome copies/nasal swab)<br>(Days post-vaccination) |         |         |       |        |        |        |        |        |
|--------|----------------------------------------|----------|---------------------------------------------------------------------------------------------------------------|---------|---------|-------|--------|--------|--------|--------|--------|
|        |                                        |          | Day 0                                                                                                         | Day 3   | Day 5   | Day 7 | Day 14 | Day 21 | Day 28 | Day 28 | Day 33 |
| 1      | BoHV-1qmv<br>vector control<br>group   | 868      | 0                                                                                                             | 138,585 | 144,680 | 259   | 0      | 0      | 0      | 0      | 0      |
| 2      |                                        | 866      | 0                                                                                                             | 1900    | 1015    | 0     | 0      | 0      | 0      | 0      | 0      |
| 3      |                                        | 890      | 0                                                                                                             | 17,694  | 1541    | 0     | 0      | 0      | 0      | 0      | 0      |
|        |                                        | Average  | 0                                                                                                             | 52,726  | 49,078  | 86    | 0      | 0      | 0      | 0      | 0      |
| 1      | BoHV-1qmv<br>Sub-RVFV<br>vaccine group | 865      | 0                                                                                                             | 241,080 | 10,871  | 0     | 0      | 0      | 0      | 0      | 0      |
| 2      |                                        | 860      | 0                                                                                                             | 10,032  | 13,810  | 0     | 0      | 0      | 0      | 0      | 0      |
| 3      |                                        | 875      | 0                                                                                                             | 5913    | 111,590 | 0     | 0      | 0      | 0      | 0      | 0      |
| 4      |                                        | 862      | 0                                                                                                             | 2868    | 945     | 0     | 0      | 0      | 0      | 0      | 0      |
| 5      |                                        | 867      | 0                                                                                                             | 5673    | 200,640 | 0     | 0      | 0      | 0      | 0      | 0      |
| 6      |                                        | 876      | 0                                                                                                             | 48,049  | 12,677  | 57    | 0      | 0      | 0      | 0      | 0      |
| 7      |                                        | 879      | 0                                                                                                             | 22,754  | 27,315  | 0     | 0      | 0      | 0      | 0      | 0      |
| 8      |                                        | 828      | 0                                                                                                             | 35,225  | 5859    | 77    | 0      | 0      | 0      | 0      | 0      |
|        |                                        | Average  | 0                                                                                                             | 46,449  | 47,963  | 16    | 0      | 0      | 0      | 0      | 0      |

**Table S3.** Bovine herpesvirus type 1 (BoHV-1)-specific neutralizing antibody titer in serum.

| S no.: | Group                            | Animal # | BoHV-1-specific neutralizing antibody titer in serum<br>(Days post-vaccination) |       |        |        |        |        |
|--------|----------------------------------|----------|---------------------------------------------------------------------------------|-------|--------|--------|--------|--------|
|        |                                  |          | Day 0                                                                           | Day 7 | Day 14 | Day 21 | Day 28 | Day 33 |
| 1      | BoHV-1qmv vector control group   | 868      | <4                                                                              | 17.57 | 46.11  | 83.05  | 66.64  | *      |
| 2      |                                  | 866      | <4                                                                              | 11.59 | 39.27  | 53.66  | 20.92  | 16.40  |
| 3      |                                  | 890      | <4                                                                              | 15.78 | 43.39  | 55.17  | 26.6   | 20.97  |
|        |                                  | Average  | <4                                                                              | 14.98 | 42.92  | 63.96  | 38.05  | 18.66  |
| 1      | BoHV-1qmv Sub-RVFV vaccine group | 865      | <4                                                                              | 18.84 | 61.37  | 94.35  | 28.62  | *      |
| 2      |                                  | 860      | <4                                                                              | 22.12 | 70.45  | 103.6  | 41.63  | 39.62  |
| 3      |                                  | 875      | <4                                                                              | <4    | 5.67   | 13.12  | 12.5   | *      |
| 4      |                                  | 862      | <4                                                                              | 7.43  | 8.80   | 16.53  | 10.91  | 9.94   |
| 5      |                                  | 867      | <4                                                                              | 11.63 | 20.96  | 25.01  | 15.44  | 10.19  |
| 6      |                                  | 876      | <4                                                                              | 7.42  | 9.03   | 14.73  | 11.61  | 7.93   |
| 7      |                                  | 879      | <4                                                                              | 4.11  | 5.26   | 11.40  | 8.15   | *      |
| 8      |                                  | 828      | <4                                                                              | <4    | 6.02   | 11.07  | 10.04  | *      |
|        |                                  | Average  | <4                                                                              | 11.93 | 23.44  | 36.23  | 17.36  | 16.92  |

\* - Sacrificed on day 28 post vaccination

**Table S4.** Rift Valley fever virus (RVFV)-specific neutralizing antibody titer in serum.

| S no.: | Group                            | Animal # | RVFV-specific neutralizing antibody titer in serum (Days post-vaccination) |       |        |        |        |        |
|--------|----------------------------------|----------|----------------------------------------------------------------------------|-------|--------|--------|--------|--------|
|        |                                  |          | Day 0                                                                      | Day 7 | Day 14 | Day 21 | Day 28 | Day 33 |
| 1      | BoHV-1qmv vector control group   | 868      | <4                                                                         | <4    | <4     | <4     | <4     | *      |
| 2      |                                  | 866      | <4                                                                         | <4    | <4     | <4     | <4     | <4     |
| 3      |                                  | 890      | <4                                                                         | <4    | <4     | <4     | <4     | <4     |
|        |                                  | Average  | <4                                                                         | <4    | <4     | <4     | <4     | <4     |
| 1      | BoHV-1qmv Sub-RVFV vaccine group | 865      | <4                                                                         | 10.02 | 13.13  | 54.71  | 53.98  | *      |
| 2      |                                  | 860      | <4                                                                         | 9.87  | 11.39  | 26.45  | 14.19  | 9.75   |
| 3      |                                  | 875      | <4                                                                         | 4.09  | 5.36   | 13.02  | 10.34  | *      |
| 4      |                                  | 862      | <4                                                                         | 4.06  | 5.64   | 5.93   | 9.42   | 9.00   |
| 5      |                                  | 867      | <4                                                                         | 5.79  | 6.49   | 8.17   | 7.67   | 6.29   |
| 6      |                                  | 876      | <4                                                                         | 5.54  | 6.3    | 7.77   | 12.02  | 32.72  |
| 7      |                                  | 879      | <4                                                                         | 5.66  | 6.48   | 10.95  | 15.67  | *      |
| 8      |                                  | 828      | <4                                                                         | 6.64  | 7.61   | 10.95  | 7.57   | *      |
|        |                                  | Average  | <4                                                                         | 6.46  | 7.68   | 17.24  | 16.34  | 14.44  |

\* - Sacrificed on day 28 post vaccination

**Table S5.** Fold change in interferon (IFN)-gamma mRNA expression in peripheral blood mononuclear cells collected from immunized calves upon stimulation with heat-inactivated Rift Valley fever virus antigen.

| S no.: | Group                            | Animal # | Fold change in IFN-gamma mRNA expression after PBMC stimulation<br>(Days post-vaccination) |       |        |
|--------|----------------------------------|----------|--------------------------------------------------------------------------------------------|-------|--------|
|        |                                  |          | Day 0                                                                                      | Day 7 | Day 14 |
| 1      | BoHV-1qmv vector control group   | 868      | 1                                                                                          | 1.01  | 1      |
| 2      |                                  | 866      | 1                                                                                          | 0.87  | 1.13   |
| 3      |                                  | 890      | 1                                                                                          | 1     | 0.9    |
|        |                                  | Average  | 1                                                                                          | 0.96  | 1.01   |
| 1      | BoHV-1qmv Sub-RVSV vaccine group | 865      | 0.97                                                                                       | 15.6  | 7.5    |
| 2      |                                  | 860      | 1                                                                                          | 8.6   | 2      |
| 3      |                                  | 875      | 1                                                                                          | 11.2  | 3.5    |
| 4      |                                  | 862      | 1                                                                                          | 4.6   | 3.7    |
| 5      |                                  | 867      | 1                                                                                          | 16.40 | 3.31   |
| 6      |                                  | 876      | 1                                                                                          | 5.74  | 3.46   |
| 7      |                                  | 879      | 1                                                                                          | 2.51  | 2.03   |
| 8      |                                  | 828      | 1                                                                                          | 2.07  | 3.55   |
|        |                                  | Average  | 1                                                                                          | 7.30  | 3.08   |
